# Supplementary material for: Integrative Systems Biology Investigation of Fabry Disease
Source: Diseases. 2016 Nov 15;4(4):35. doi: 10.3390/diseases4040035 (PMC5456327; doi:10.3390/diseases4040035)
Supplement: Supplementary file 1 [file diseases-04-00035-s001.pdf]

# Supplementary Materials: Integrative Systems Biology Investigation of Fabry Disease

Marco Fernandes and Holger Husi

## 1. Most Frequently Reported Genes/Proteins across the Dataspace—Naïve Patients

**Table S1.** Most frequent genes/proteins found across the naïve patients datasets and their respective functional tag and regulation.

| Protein Name                                           | Gene Name               | PADB-KW Long                                                                                                       | Regulation | Frequency |
|--------------------------------------------------------|-------------------------|--------------------------------------------------------------------------------------------------------------------|------------|-----------|
| Ig kappa chain                                         | IGK, SDNK1, A30         | IGG: Immunoglobulin                                                                                                | up         | 4         |
| Alpha-1-acid glycoprotein 1 precursor                  | ORM1, AGP1, ORM2        | ENZ: enzyme, enzymatic properties                                                                                  | up         | 3         |
| Alpha-1-acid glycoprotein 2 precursor                  | ORM2, AGP2, AGP-B       | ENZ: enzyme, enzymatic properties                                                                                  | up         | 3         |
| Serum albumin precursor                                | ALB, GIG20, GIG42       | TP: transport, storage, endocytosis, exocytosis, vesicles                                                          | up         | 3         |
| Apolipoprotein A-IV precursor                          | APOA4, ApoA-IV, APOA-IV | TP: transport, storage, endocytosis, exocytosis, vesicles                                                          | up         | 3         |
| Hemoglobin subunit alpha                               | HBA1, HBA2, HBZ         | TP: transport, storage, endocytosis, exocytosis, vesicles                                                          | down       | 3         |
| Inter-alpha-trypsin inhibitor heavy chain H4 precursor | ITIH4, IHRP, ITIHL1     | ENZ: enzyme, enzymatic properties                                                                                  | up         | 3         |
| Prostaglandin-H2 D-isomerase precursor                 | PTGDS, PDS, PGDS2       | ENZ: enzyme, enzymatic properties                                                                                  | up         | 3         |
| Uromodulin precursor                                   | UMOD                    | DIS: disease                                                                                                       | up         | 3         |
| 14-3-3 protein zeta/delta                              | YWHAZ                   | SCA: scaffold, docking, adaptor                                                                                    | up         | 2         |
| Alpha-1-antichymotrypsin precursor                     | SERPINA3, AACT, GIG24   | INH: inhibitor (protease, kinase, other enzymes, pathways)                                                         | up         | 2         |
| Angiotensinogen                                        | AGT, SERPINA8           | SIG: signalling                                                                                                    | down       | 2         |
| Apolipoprotein A-I precursor                           | APOA1, A175P            | TP: transport, storage, endocytosis, exocytosis, vesicles                                                          | down       | 2         |
| Beta-2-glycoprotein 1 precursor                        | APOH, B2G1              | UK: unknown                                                                                                        | up         | 2         |
| Clusterin precursor                                    | CLU, APOJ, CLI          | CHA: chaperone, chaperonin                                                                                         | down       | 2         |
| Fibrinogen alpha/alpha-E chain precursor               | FGA                     | MOD: modulator, regulator                                                                                          | up         | 2         |
| Granulins precursor                                    | GRN                     | SIG: signalling                                                                                                    | up         | 2         |
| Ribonuclease pancreatic precursor                      | RNASE1, RIB1, RNS1      | ENZ: enzyme, enzymatic properties                                                                                  | up         | 2         |
| Nonsecretory ribonuclease precursor                    | RNASE2, EDN, RNS2       | ENZ: enzyme, enzymatic properties                                                                                  | up         | 2         |
| Proactivator polypeptide precursor                     | PSAP, GLBA, SAP1        | MOD: modulator, regulator                                                                                          | up         | 2         |
| Protein SHISA-5                                        | SHISA5, SCOTIN          | SIG: signalling                                                                                                    | up         | 2         |
| Secreted Ly-6/uPAR related protein 1 precursor         | SLURP1, ARS             | SIG: signalling                                                                                                    | up         | 2         |
| Vitamin D-binding protein precursor                    | GC                      | CS: Cell shape (cytoskeleton, cell adhesion, morphology, cell junction, cellular structures, extracellular matrix) | up         | 2         |
| Immunoglobulin G1 Fab heavy chain variable region      | IGH, VH1, IGHG1         | IGG: Immunoglobulin                                                                                                | up         | 2         |
| Serotransferrin precursor                              | TF, PRBPO1400           | TP: transport, storage, endocytosis, exocytosis, vesicles                                                          | up         | 2         |

## 2. Most Frequently Reported Genes/Proteins across the Dataspace—ERT Patients

**Table S2.** Most frequent genes/proteins found across the ERT patients datasets and their respective functional tag and regulation.

| Protein Name                                          | Gene Name            | PADB-KW Long                                                                                                       | Regulation | Frequency |
|-------------------------------------------------------|----------------------|--------------------------------------------------------------------------------------------------------------------|------------|-----------|
| Ig kappa chain                                        | IGK, SDNK1, A30      | IGG: Immunoglobulin                                                                                                | up         | 4         |
| Alpha-1-acid glycoprotein 1 precursor                 | ORM1, AGP1, ORM2     | ENZ: enzyme, enzymatic properties                                                                                  | down       | 3         |
| Alpha-1-acid glycoprotein 2 precursor                 | ORM2, AGP2, AGP-B    | ENZ: enzyme, enzymatic properties                                                                                  | down       | 3         |
| Prostaglandin-H2 D-isomerase precursor                | PTGDS, PDS, PGDS2    | ENZ: enzyme, enzymatic properties                                                                                  | down       | 3         |
| AMBP protein precursor                                | AMBP, ITIL, HCP      | INH: inhibitor (protease, kinase, other enzymes, pathways)                                                         | down       | 2         |
| Fibrinogen alpha/alpha-E chain precursor              | FGA                  | MOD: modulator, regulator                                                                                          | down       | 2         |
| Serine/cysteine proteinase inhibitor clade G member 1 | SERPING1, C1IN, C1NH | INH: inhibitor (protease, kinase, other enzymes, pathways)                                                         | up         | 2         |
| Retinol binding protein 4, plasma                     | RBP4, PRO2222, PRBP  | TP: transport, storage, endocytosis, exocytosis, vesicles                                                          | down       | 2         |
| Nonsecretory ribonuclease precursor                   | RNASE2, EDN, RNS2    | ENZ: enzyme, enzymatic properties                                                                                  | down       | 2         |
| Proactivator polypeptide precursor                    | PSAP, GLBA, SAP1     | MOD: modulator, regulator                                                                                          | down       | 2         |
| Prothrombin precursor                                 | F2                   | ENZ: enzyme, enzymatic properties                                                                                  | up         | 2         |
| Vitamin D-binding protein precursor                   | GC                   | CS: Cell shape (cytoskeleton, cell adhesion, morphology, cell junction, cellular structures, extracellular matrix) | down       | 2         |
| Immunoglobulin G1 Fab heavy chain variable region     | IGH, VH1, IGHG1      | IGG: Immunoglobulin                                                                                                | down       | 2         |
| Serotransferrin precursor                             | TF, PRO1400          | TP: transport, storage, endocytosis, exocytosis, vesicles                                                          | down       | 2         |

## 3. Analysis with All Reported Features—Term Clustering Naïve Patients—Gene Ontology (GO) Plus Associated Genes with Processes and Pathways

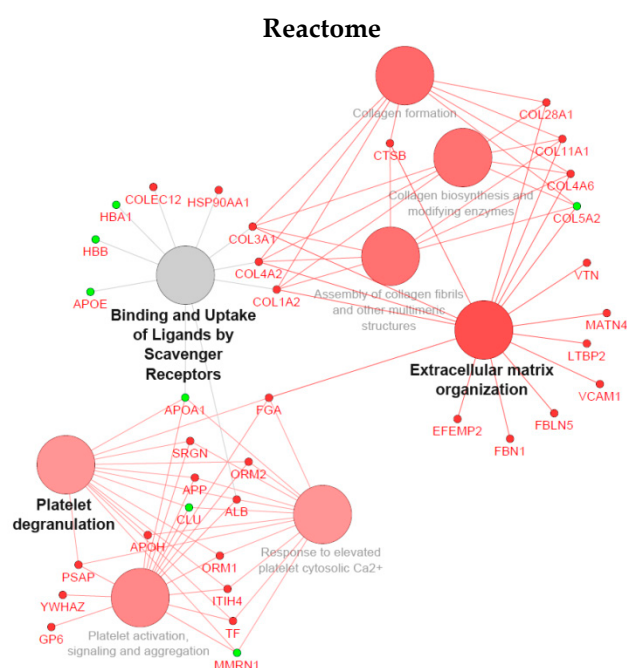

**Figure S1.** Reactome terms representing molecular regulation for Fabry naïve patients.

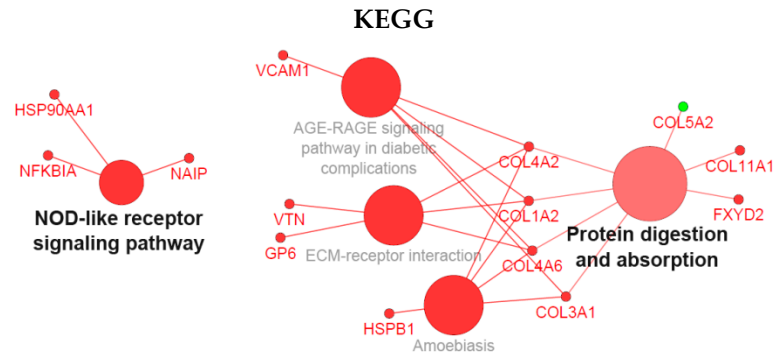

Figure S2. KEGG terms representing molecular regulation for Fabry naïve patients.

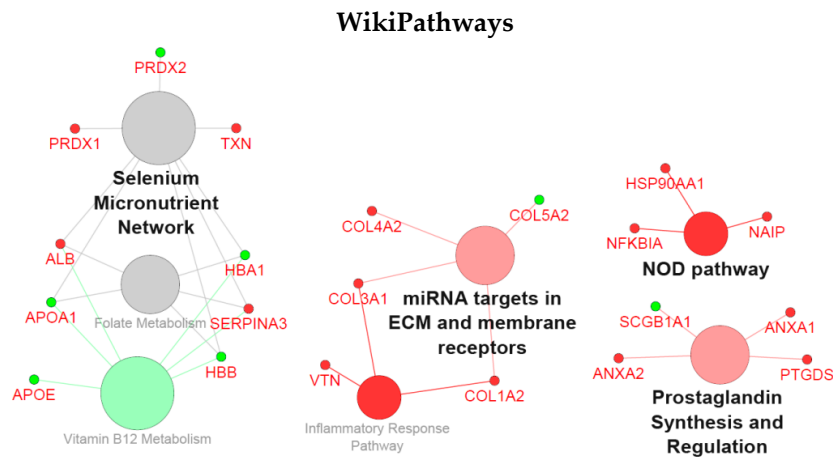

Figure S3. WikiPathways terms representing molecular regulation for Fabry naïve patients.

4. Analysis with All Reported Features—Term Clustering ERT Patients—Gene Ontology (GO) Plus Associated Genes with Processes and Pathways

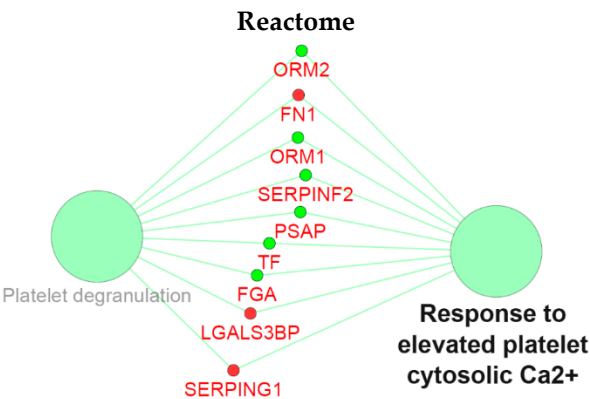

Figure S4. Reactome terms representing molecular regulation for ERT patients.

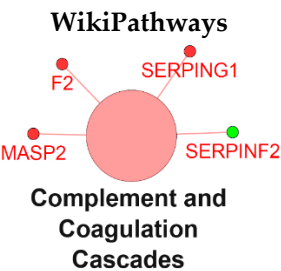

Figure S5. WikiPathways terms representing molecular regulation for ERT patients.

**Table S3.** GO and pathway terms clustering from ClueGO analysis of data of the FD group. Cluster #1 and cluster #2 correspond respectively to up-regulated and down-regulated molecules.

| GO Term                                                  | Term BF-<br><i>p</i> -Value | Group BF-<br><i>p</i> -Value | GO<br>Groups | % Associated<br>Genes | Cluster                 | Genes Cluster #1                                                                  | Genes Cluster #2    | % Genes<br>Cluster #1 | % Genes<br>Cluster #2 |
|----------------------------------------------------------|-----------------------------|------------------------------|--------------|-----------------------|-------------------------|-----------------------------------------------------------------------------------|---------------------|-----------------------|-----------------------|
| <b>BP: Biological Process</b>                            |                             |                              |              |                       |                         |                                                                                   |                     |                       |                       |
| acute inflammatory response                              | 17.0E-6                     | 17.0E-6                      | Group 0      | 5.06                  | Specific for Cluster #1 | [DEFB1, IL1RN, ITIH4, ORM1, ORM2, SERPINA3, VCAM1, VTN]                           |                     | 100.00                | 0.00                  |
| platelet degranulation                                   | 300.0E-15                   | 160.0E-15                    | Group 1      | 12.17                 | Specific for Cluster #1 | [ALB, APOH, APP, FGA, ITIH4, ORM1, ORM2, PSAP, SERPINA3, SRGN, TF]                | [APOA1, CLU, MMRN1] | 78.57                 | 21.43                 |
| multicellular organism metabolic process                 | 1.4E-6                      | 88.0E-9                      | Group 2      | 6.77                  | Specific for Cluster #1 | [APOA4, COL11A1, COL1A2, COL3A1, COL4A2, COL4A6, CTSB]                            | [COL5A2, PRTN3]     | 77.78                 | 22.22                 |
| multicellular organism catabolic process                 | 17.0E-9                     | 88.0E-9                      | Group 2      | 11.84                 | Specific for Cluster #1 | [APOA4, COL11A1, COL1A2, COL3A1, COL4A2, COL4A6, CTSB]                            | [COL5A2, PRTN3]     | 77.78                 | 22.22                 |
| multicellular organismal macromolecule metabolic process | 4.8E-6                      | 88.0E-9                      | Group 2      | 6.78                  | Specific for Cluster #1 | [COL11A1, COL1A2, COL3A1, COL4A2, COL4A6, CTSB]                                   | [COL5A2, PRTN3]     | 75.00                 | 25.00                 |
| response to amino acid                                   | 14.0E-6                     | 88.0E-9                      | Group 2      | 6.73                  | Specific for Cluster #1 | [C1QTNF1, COL1A2, COL3A1, COL4A6, MUC1, NAIP]                                     | [COL5A2]            | 85.71                 | 14.29                 |
| collagen catabolic process                               | 120.0E-9                    | 88.0E-9                      | Group 2      | 11.43                 | Specific for Cluster #1 | [COL11A1, COL1A2, COL3A1, COL4A2, COL4A6, CTSB]                                   | [COL5A2, PRTN3]     | 75.00                 | 25.00                 |
| collagen metabolic process                               | 4.1E-6                      | 88.0E-9                      | Group 2      | 7.08                  | Specific for Cluster #1 | [COL11A1, COL1A2, COL3A1, COL4A2, COL4A6, CTSB]                                   | [COL5A2, PRTN3]     | 75.00                 | 25.00                 |
| regulation of wound healing                              | 13.0E-6                     | 10.0E-6                      | Group 3      | 5.76                  | Specific for Cluster #1 | [ANXA1, ANXA2, APOH, C1QTNF1, FGA, VTN]                                           | [APOE, MYLK]        | 75.00                 | 25.00                 |
| negative regulation of peptidase activity                | 17.0E-9                     | 9.4E-9                       | Group 4      | 5.32                  | Specific for Cluster #1 | [APP, CD27, COL28A1, CSTB, ITIH4, NAIP, NGFR, PI3, SERPINA3, SPINK1, SPINT1, VTN] | [AGT, GPC3]         | 85.71                 | 14.29                 |
| negative regulation of endopeptidase activity            | 91.0E-9                     | 9.4E-9                       | Group 4      | 5.16                  | Specific for Cluster #1 | [APP, CD27, COL28A1, CSTB, ITIH4, NAIP, NGFR, PI3, SERPINA3, SPINK1, SPINT1, VTN] | [AGT]               | 92.31                 | 7.69                  |
| platelet activation                                      | 140.0E-9                    | 79.0E-9                      | Group 5      | 6.36                  | Specific for Cluster #1 | [C1QTNF1, COL1A2, COL3A1, FGA, GP6, HSPB1, RNASE1, YWHAZ]                         | [APOE, CLIC1, HBB]  | 72.73                 | 27.27                 |
| cellular response to reactive oxygen species             | 39.0E-6                     | 39.0E-6                      | Group 6      | 4.90                  | Specific for Cluster #1 | [ANXA1, APOA4, FBLN5, PRDX1, PSAP, TXN]                                           | [PRDX2]             | 85.71                 | 14.29                 |

Table S3. Cont.

| GO Term                                      | Term BF-<br><i>p</i> -Value | Group BF-<br><i>p</i> -Value | GO<br>Groups | % Associated<br>Genes | Cluster                 | Genes Cluster #1                                                                                                                                                          | Genes Cluster #2                                        | % Genes<br>Cluster #1 | % Genes<br>Cluster #2 |
|----------------------------------------------|-----------------------------|------------------------------|--------------|-----------------------|-------------------------|---------------------------------------------------------------------------------------------------------------------------------------------------------------------------|---------------------------------------------------------|-----------------------|-----------------------|
| extracellular structure organization         | 1.3E-9                      | 700.0E-12                    | Group 7      | 4.86                  | Specific for Cluster #1 | [ANXA2, APP, COL11A1, COL1A2, COL3A1, COL4A2, COL4A6, FBLN5, FBN1, FGA, LTBP2, MATN4, SPINT1, VCAM1, VTN]                                                                 | [AGT, COL5A2]                                           | 88.24                 | 11.76                 |
| extracellular matrix organization            | 1.3E-9                      | 700.0E-12                    | Group 7      | 4.87                  | Specific for Cluster #1 | [ANXA2, APP, COL11A1, COL1A2, COL3A1, COL4A2, COL4A6, FBLN5, FBN1, FGA, LTBP2, MATN4, SPINT1, VCAM1, VTN]                                                                 | [AGT, COL5A2]                                           | 88.24                 | 11.76                 |
| <b>MF: Molecular Function</b>                |                             |                              |              |                       |                         |                                                                                                                                                                           |                                                         |                       |                       |
| serine-type endopeptidase inhibitor activity | 300.0E-9                    | 300.0E-9                     | Group 0      | 8.08                  | Specific for Cluster #1 | [APP, COL28A1, ITIH4, PI3, SERPINA3, SPINK1, SPINT1]                                                                                                                      | [AGT]                                                   | 87.50                 | 12.50                 |
| peptidase inhibitor activity                 | 9.2E-9                      | 9.2E-9                       | Group 1      | 6.35                  | Specific for Cluster #1 | [APP, CD27, COL28A1, CSTB, ITIH4, NAIP, PI3, SERPINA3, SPINK1, SPINT1]                                                                                                    | [AGT, GPC3]                                             | 83.33                 | 16.67                 |
| CC                                           |                             |                              |              |                       |                         |                                                                                                                                                                           |                                                         |                       |                       |
| extracellular matrix                         | 2.6E-21                     | 1.4E-21                      | Group 0      | 5.90                  | Specific for Cluster #1 | [ANXA2, APOH, COL11A1, COL1A2, COL28A1, COL3A1, COL4A2, COL4A6, DSP, EFEMP2, FBLN5, FBN1, HSP90AA1, HSPB1, LGALS1, LTBP2, MYL6, PI3, PKM, PRDX1, RNASE1, TGM4, UMOD, VTN] | [APOE, CLU, COL5A2, GPC3, MMRN1, PCSK6, PRTN3, SPARCL1] | 75.00                 | 25.00                 |
| melanosome                                   | 84.0E-6                     | 84.0E-6                      | Group 1      | 5.36                  | Specific for Cluster #1 | [ANXA2, CTSB, HSP90AA1, PRDX1, RNASE1, YWHAZ]                                                                                                                             |                                                         | 100.00                | 0.00                  |
| vacuolar lumen                               | 470.0E-9                    | 230.0E-9                     | Group 2      | 7.14                  | Specific for Cluster #1 | [APP, CTSB, GC, GLB1, HEXB, HSP90AA1, PSAP]                                                                                                                               | [B2M, GPC3]                                             | 77.78                 | 22.22                 |
| lysosomal lumen                              | 8.9E-6                      | 230.0E-9                     | Group 2      | 7.22                  | Specific for Cluster #1 | [CTSB, GC, GLB1, HEXB, HSP90AA1, PSAP]                                                                                                                                    | [GPC3]                                                  | 85.71                 | 14.29                 |
| extracellular matrix component               | 270.0E-12                   | 130.0E-12                    | Group 3      | 9.16                  | Specific for Cluster #1 | [ANXA2, COL11A1, COL1A2, COL28A1, COL3A1, COL4A2, COL4A6, EFEMP2, FBLN5, FBN1, VTN]                                                                                       | [COL5A2]                                                | 91.67                 | 8.33                  |
| basement membrane                            | 6.8E-6                      | 130.0E-12                    | Group 3      | 7.07                  | Specific for Cluster #1 | [ANXA2, COL28A1, COL4A2, COL4A6, EFEMP2, FBN1, VTN]                                                                                                                       |                                                         | 100.00                | 0.00                  |

Table S3. Cont.

| GO Term                                                            | Term BF-<br><i>p</i> -Value | Group BF-<br><i>p</i> -Value | GO<br>Groups | % Associated<br>Genes | Cluster                    | Genes Cluster #1                                                                                                         | Genes Cluster #2                           | % Genes<br>Cluster #1 | % Genes<br>Cluster #2 |
|--------------------------------------------------------------------|-----------------------------|------------------------------|--------------|-----------------------|----------------------------|--------------------------------------------------------------------------------------------------------------------------|--------------------------------------------|-----------------------|-----------------------|
| cytoplasmic membrane-<br>bounded vesicle lumen                     | 230.0E-21                   | 110.0E-21                    | Group 4      | 15.52                 | Specific for<br>Cluster #1 | [ALB, APOH, APP, C1QTNF1,<br>FGA, HSP90AA1, ITIH4, ORM1,<br>ORM2, SERPINA3, SRGN, TF]                                    | [APOA1, APOE,<br>CLU, HBA1, HBB,<br>MMRN1] | 66.67                 | 33.33                 |
| secretory granule lumen                                            | 8.4E-15                     | 110.0E-21                    | Group 4      | 14.74                 | Specific for<br>Cluster #1 | [ALB, APOH, APP, C1QTNF1,<br>FGA, ITIH4, ORM1, ORM2,<br>SERPINA3, SRGN, TF]                                              | [APOA1, CLU,<br>MMRN1]                     | 78.57                 | 21.43                 |
| platelet alpha granule<br>lumen                                    | 650.0E-12                   | 110.0E-21                    | Group 4      | 15.25                 | Specific for<br>Cluster #1 | [ALB, APP, FGA, ORM1, ORM2,<br>SERPINA3, SRGN]                                                                           | [CLU, MMRN1]                               | 77.78                 | 22.22                 |
| <b>Reactome</b>                                                    |                             |                              |              |                       |                            |                                                                                                                          |                                            |                       |                       |
| Extracellular matrix<br>organization                               | 15.0E-9                     | 6.0E-9                       | Group 0      | 5.56                  | Specific for<br>Cluster #1 | [COL11A1, COL1A2, COL28A1,<br>COL3A1, COL4A2, COL4A6,<br>CTSB, EFEMP2, FBLN5, FBN1,<br>FGA, LTBP2, MATN4, VCAM1,<br>VTN] | [COL5A2]                                   | 93.75                 | 6.25                  |
| Collagen formation                                                 | 2.0E-6                      | 6.0E-9                       | Group 0      | 8.99                  | Specific for<br>Cluster #1 | [COL11A1, COL1A2, COL28A1,<br>COL3A1, COL4A2, COL4A6,<br>CTSB]                                                           | [COL5A2]                                   | 87.50                 | 12.50                 |
| Collagen biosynthesis<br>and modifying enzymes                     | 1.7E-6                      | 6.0E-9                       | Group 0      | 10.45                 | Specific for<br>Cluster #1 | [COL11A1, COL1A2, COL28A1,<br>COL3A1, COL4A2, COL4A6]                                                                    | [COL5A2]                                   | 85.71                 | 14.29                 |
| Assembly of collagen<br>fibrils and other<br>multimeric structures | 1.2E-6                      | 6.0E-9                       | Group 0      | 12.96                 | Specific for<br>Cluster #1 | [COL11A1, COL1A2, COL3A1,<br>COL4A2, COL4A6, CTSB]                                                                       | [COL5A2]                                   | 85.71                 | 14.29                 |
| Binding and Uptake of<br>Ligands by Scavenger<br>Receptors         | 11.0E-12                    | 4.2E-12                      | Group 1      | 24.39                 | Specific for<br>Cluster #1 | [ALB, COL1A2, COL3A1,<br>COL4A2, COLEC12, HSP90AA1]                                                                      | [APOA1, APOE,<br>HBA1, HBB]                | 60.00                 | 40.00                 |
| Platelet degranulation                                             | 380.0E-12                   | 12.0E-9                      | Group 2      | 10.32                 | Specific for<br>Cluster #1 | [ALB, APOH, APP, FGA, ITIH4,<br>ORM1, ORM2, PSAP, SRGN, TF]                                                              | [APOA1, CLU,<br>MMRN1]                     | 76.92                 | 23.08                 |
| Platelet activation,<br>signaling and<br>aggregation               | 49.0E-9                     | 12.0E-9                      | Group 2      | 5.47                  | Specific for<br>Cluster #1 | [ALB, APOH, APP, FGA, GP6,<br>ITIH4, ORM1, ORM2, PSAP,<br>SRGN, TF, YWHAZ]                                               | [APOA1, CLU,<br>MMRN1]                     | 80.00                 | 20.00                 |
| Response to elevated<br>platelet cytosolic Ca <sup>2+</sup>        | 540.0E-12                   | 12.0E-9                      | Group 2      | 9.92                  | Specific for<br>Cluster #1 | [ALB, APOH, APP, FGA, ITIH4,<br>ORM1, ORM2, PSAP, SRGN, TF]                                                              | [APOA1, CLU,<br>MMRN1]                     | 76.92                 | 23.08                 |
| <b>KEGG</b>                                                        |                             |                              |              |                       |                            |                                                                                                                          |                                            |                       |                       |
| NOD-like receptor<br>signaling pathway                             | 10.0E-3                     | 10.0E-3                      | Group 0      | 5.26                  | Specific for<br>Cluster #1 | [HSP90AA1, NAIP, NFKBIA]                                                                                                 |                                            | 100.00                | 0.00                  |
| African trypanosomiasis                                            | 820.0E-6                    | 330.0E-6                     | Group 1      | 11.43                 | Specific for<br>Cluster #2 | [VCAM1]                                                                                                                  | [APOA1, HBA1,<br>HBB]                      | 25.00                 | 75.00                 |
| ECM-receptor<br>interaction                                        | 1.9E-3                      | 64.0E-6                      | Group 2      | 6.10                  | Specific for<br>Cluster #1 | [COL1A2, COL4A2, COL4A6,<br>GP6, VTN]                                                                                    |                                            | 100.00                | 0.00                  |

Table S3. Cont.

| GO Term                                              | Term BF-<br><i>p</i> -Value | Group BF-<br><i>p</i> -Value | GO<br>Groups | % Associated<br>Genes | Cluster                  | Genes Cluster #1                                 | Genes Cluster #2          | % Genes<br>Cluster #1 | % Genes<br>Cluster #2 |
|------------------------------------------------------|-----------------------------|------------------------------|--------------|-----------------------|--------------------------|--------------------------------------------------|---------------------------|-----------------------|-----------------------|
| AGE-RAGE signaling pathway in diabetic complications | 2.5E-3                      | 64.0E-6                      | Group 2      | 4.95                  | Specific for Cluster #1  | [COL1A2, COL3A1, COL4A2, COL4A6, VCAM1]          |                           | 100.00                | 0.00                  |
| Protein digestion and absorption                     | 40.0E-6                     | 64.0E-6                      | Group 2      | 7.78                  | Specific for Cluster #1  | [COL11A1, COL1A2, COL3A1, COL4A2, COL4A6, FXVD2] | [COL5A2]                  | 85.71                 | 14.29                 |
| Amoebiasis                                           | 3.5E-3                      | 64.0E-6                      | Group 2      | 5.00                  | Specific for Cluster #1  | [COL1A2, COL3A1, COL4A2, COL4A6, HSPB1]          |                           | 100.00                | 0.00                  |
| <b>WikiPathways</b>                                  |                             |                              |              |                       |                          |                                                  |                           |                       |                       |
| NOD pathway                                          | 8.1E-3                      | 8.1E-3                       | Group 0      | 7.32                  | Specific for Cluster #1  | [HSP90AA1, NAIP, NFKBIA]                         |                           | 100.00                | 0.00                  |
| Selenium Micronutrient Network                       | 17.0E-6                     | 9.7E-6                       | Group 1      | 8.99                  | None<br>Specific Cluster | [ALB, PRDX1, SERPINA3, TXN]                      | [APOA1, HBA1, HBB, PRDX2] | 50.00                 | 50.00                 |
| Vitamin B12 Metabolism                               | 72.0E-6                     | 9.7E-6                       | Group 1      | 11.54                 | Specific for Cluster #2  | [ALB, SERPINA3]                                  | [APOA1, APOE, HBA1, HBB]  | 33.33                 | 66.67                 |
| Folate Metabolism                                    | 2.1E-3                      | 9.7E-6                       | Group 1      | 7.46                  | Specific for Cluster #2  | [ALB, SERPINA3]                                  | [APOA1, HBA1, HBB]        | 40.00                 | 60.00                 |
| miRNA targets in ECM and membrane receptors          | 2.2E-3                      | 950.0E-6                     | Group 2      | 9.76                  | Specific for Cluster #1  | [COL1A2, COL3A1, COL4A2]                         | [COL5A2]                  | 75.00                 | 25.00                 |
| Inflammatory Response Pathway                        | 6.7E-3                      | 950.0E-6                     | Group 2      | 10.00                 | Specific for Cluster #1  | [COL1A2, COL3A1, VTN]                            |                           | 100.00                | 0.00                  |
| Prostaglandin Synthesis and Regulation               | 1.0E-3                      | 650.0E-6                     | Group 3      | 13.33                 | Specific for Cluster #1  | [ANXA1, ANXA2, PTGDS]                            | [SCGB1A1]                 | 75.00                 | 25.00                 |

**Table S4.** GO and pathway terms clustering from ClueGO analysis of data of the ERT group. Cluster #1 and cluster #2 correspond respectively to up-regulated and down-regulated molecules.

| GO Term                                        | Term<br>BF-p<br>Value | Group<br>BF-p<br>Value | GO<br>Groups | %<br>Associated<br>Genes | Cluster                    | Genes Cluster #1          | Genes Cluster #2                         | %Genes<br>Cluster #1 | %Genes<br>Cluster #2 |
|------------------------------------------------|-----------------------|------------------------|--------------|--------------------------|----------------------------|---------------------------|------------------------------------------|----------------------|----------------------|
| <b>BP: Biological Process</b>                  |                       |                        |              |                          |                            |                           |                                          |                      |                      |
| platelet degranulation                         | 94.0E-12              | 47.0E-12               | Group 0      | 7.83                     | Specific for<br>Cluster #2 | [FN1, LGALS3BP, SERPING1] | [FGA, ORM1, ORM2, PSAP,<br>SERPINF2, TF] | 33.33                | 66.67                |
| acute-phase response                           | 930.0E-9              | 930.0E-9               | Group 1      | 8.47                     | Specific for<br>Cluster #2 | [F2, FN1]                 | [ORM1, ORM2, SERPINF2]                   | 40.00                | 60.00                |
| negative regulation of<br>coagulation          | 1.1E-6                | 1.1E-6                 | Group 2      | 8.77                     | Specific for<br>Cluster #2 | [F2, SERPING1]            | [FGA, KRT1, SERPINF2]                    | 40.00                | 60.00                |
| negative regulation of<br>hemostasis           | 980.0E-9              | 1.1E-6                 | Group 2      | 9.62                     | Specific for<br>Cluster #2 | [F2, SERPING1]            | [FGA, KRT1, SERPINF2]                    | 40.00                | 60.00                |
| negative regulation of<br>blood coagulation    | 980.0E-9              | 1.1E-6                 | Group 2      | 9.62                     | Specific for<br>Cluster #2 | [F2, SERPING1]            | [FGA, KRT1, SERPINF2]                    | 40.00                | 60.00                |
| negative regulation of<br>wound healing        | 820.0E-9              | 1.1E-6                 | Group 2      | 7.58                     | Specific for<br>Cluster #2 | [F2, SERPING1]            | [FGA, KRT1, SERPINF2]                    | 40.00                | 60.00                |
| fibrinolysis                                   | 83.0E-9               | 1.1E-6                 | Group 2      | 16.13                    | Specific for<br>Cluster #2 | [F2, SERPING1]            | [FGA, KRT1, SERPINF2]                    | 40.00                | 60.00                |
| <b>MF: Molecular Function</b>                  |                       |                        |              |                          |                            |                           |                                          |                      |                      |
| interleukin-1 receptor<br>activity             | 660.0E-6              | 530.0E-6               | Group 0      | 28.57                    | Specific for<br>Cluster #1 | [IL18R1, IL1R1]           |                                          | 100.00               | 0.00                 |
| scavenger receptor activity                    | 6.4E-3                | 6.4E-3                 | Group 1      | 4.26                     | Specific for<br>Cluster #1 | [LGALS3BP, TINAGL1]       |                                          | 100.00               | 0.00                 |
| isoprenoid binding                             | 11.0E-3               | 11.0E-3                | Group 2      | 4.55                     | Specific for<br>Cluster #2 | []                        | [PTGDS, RBP4]                            | 0.00                 | 100.00               |
| retinoid binding                               | 16.0E-3               | 11.0E-3                | Group 2      | 4.65                     | Specific for<br>Cluster #2 | []                        | [PTGDS, RBP4]                            | 0.00                 | 100.00               |
| immunoglobulin receptor<br>binding             | 9.2E-3                | 6.9E-3                 | Group 3      | 7.14                     | Specific for<br>Cluster #2 | []                        | [IGHA2, IGHG4]                           | 0.00                 | 100.00               |
| <b>CC: Cellular Component</b>                  |                       |                        |              |                          |                            |                           |                                          |                      |                      |
| keratin filament                               | 4.1E-6                | 4.1E-6                 | Group 0      | 5.10                     | Specific for<br>Cluster #2 | [KRT14]                   | [KRT1, KRT5, KRT6C,<br>KRT77]            | 20.00                | 80.00                |
| vesicle lumen                                  | 1.6E-9                | 2.8E-9                 | Group 1      | 6.84                     | Specific for<br>Cluster #2 | [FN1, LGALS3BP, SERPING1] | [FGA, ORM1, ORM2,<br>SERPINF2, TF]       | 37.50                | 62.50                |
| cytoplasmic membrane-<br>bounded vesicle lumen | 1.8E-9                | 2.8E-9                 | Group 1      | 6.90                     | Specific for<br>Cluster #2 | [FN1, LGALS3BP, SERPING1] | [FGA, ORM1, ORM2,<br>SERPINF2, TF]       | 37.50                | 62.50                |
| secretory granule lumen                        | 440.0E-<br>12         | 2.8E-9                 | Group 1      | 8.42                     | Specific for<br>Cluster #2 | [FN1, LGALS3BP, SERPING1] | [FGA, ORM1, ORM2,<br>SERPINF2, TF]       | 37.50                | 62.50                |

Table S4. Cont.

| GO Term                                                     | Term<br>BF- <i>p</i><br>Value | Group<br>BF- <i>p</i><br>Value | GO<br>Groups | %<br>Associated<br>Genes | Cluster                    | Genes Cluster #1                      | Genes Cluster #2                                                    | %Genes<br>Cluster #1 | %Genes<br>Cluster #2 |
|-------------------------------------------------------------|-------------------------------|--------------------------------|--------------|--------------------------|----------------------------|---------------------------------------|---------------------------------------------------------------------|----------------------|----------------------|
| platelet alpha granule                                      | 83.0E-9                       | 2.8E-9                         | Group 1      | 7.50                     | Specific for<br>Cluster #2 | [FN1, SERPING1]                       | [FGA, ORM1, ORM2,<br>SERPINF2]                                      | 33.33                | 66.67                |
| platelet alpha granule<br>lumen                             | 19.0E-9                       | 2.8E-9                         | Group 1      | 10.17                    | Specific for<br>Cluster #2 | [FN1, SERPING1]                       | [FGA, ORM1, ORM2,<br>SERPINF2]                                      | 33.33                | 66.67                |
| blood microparticle                                         | 56.0E-21                      | 24.0E-21                       | Group 2      | 9.93                     | Specific for<br>Cluster #2 | [F2, FN1, GSN, LGALS3BP,<br>SERPING1] | [AMBP, FGA, GC, IGHA2,<br>IGHG4, KRT1, ORM1,<br>ORM2, SERPINF2, TF] | 33.33                | 66.67                |
| <b>Reactome</b>                                             |                               |                                |              |                          |                            |                                       |                                                                     |                      |                      |
| Platelet degranulation                                      | 86.0E-12                      | 61.0E-12                       | Group 0      | 7.14                     | Specific for<br>Cluster #2 | [FN1, LGALS3BP, SERPING1]             | [FGA, ORM1, ORM2, PSAP,<br>SERPINF2, TF]                            | 33.33                | 66.67                |
| Response to elevated<br>platelet cytosolic Ca <sup>2+</sup> | 61.0E-12                      | 61.0E-12                       | Group 0      | 6.87                     | Specific for<br>Cluster #2 | [FN1, LGALS3BP, SERPING1]             | [FGA, ORM1, ORM2, PSAP,<br>SERPINF2, TF]                            | 33.33                | 66.67                |
| <b>WikiPathways</b>                                         |                               |                                |              |                          |                            |                                       |                                                                     |                      |                      |
| Complement and<br>Coagulation Cascades                      | 60.0E-6                       | 60.0E-6                        | Group 0      | 6.78                     | Specific for<br>Cluster #1 | [F2, MASP2, SERPING1]                 | [SERPINF2]                                                          | 75.00                | 25.00                |

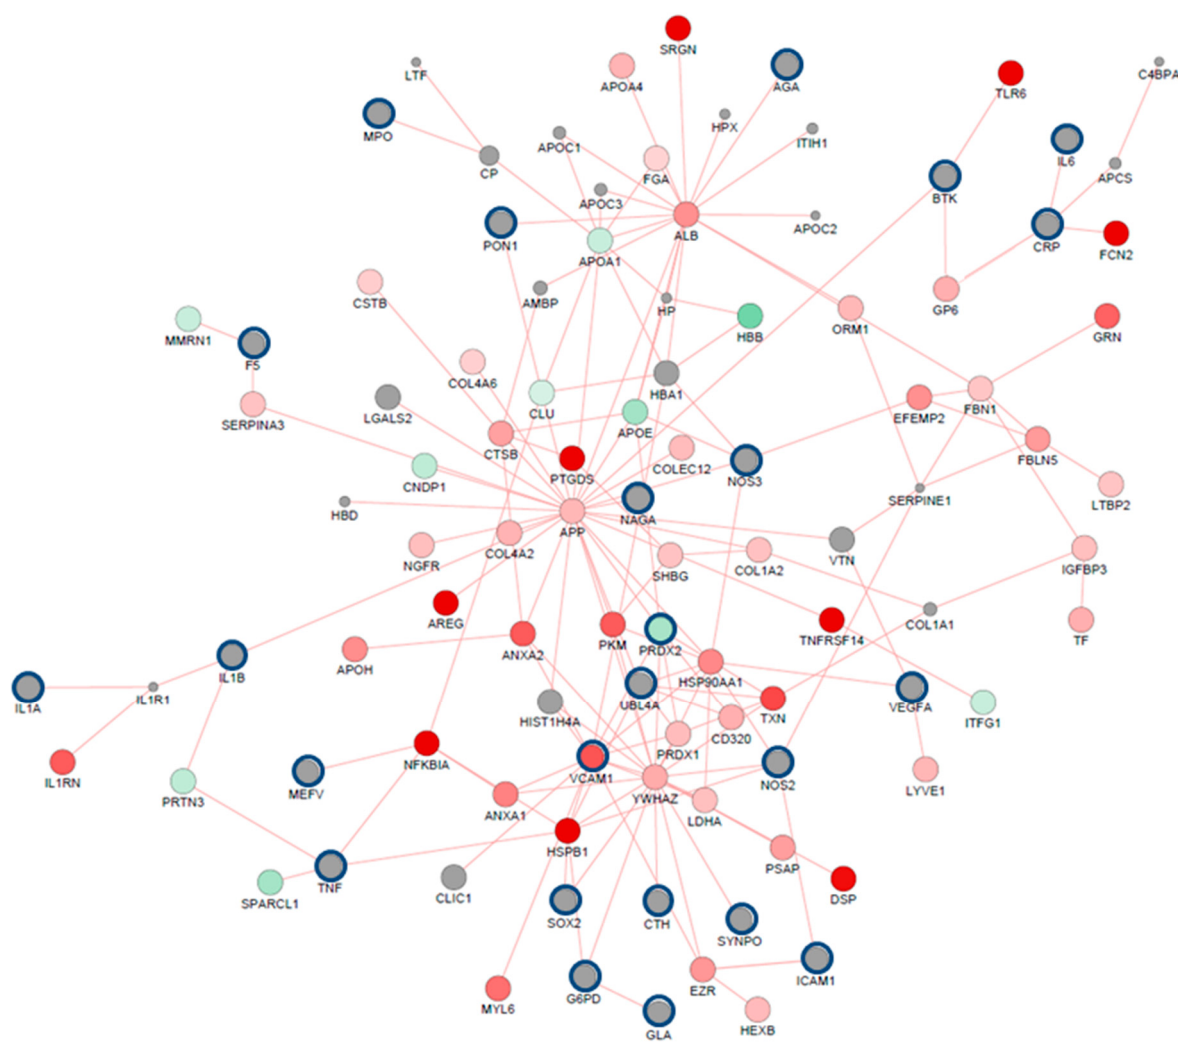

## 5. Disease Analysis—DisGeNET

| Symbol | Gene Name                                              | Pathway                                                             | Panther Classification   | Score | #PMIDs | #SNPs | #Diseases |
|--------|--------------------------------------------------------|---------------------------------------------------------------------|--------------------------|-------|--------|-------|-----------|
| GLA    | galactosidase, alpha                                   | Metabolism                                                          | null                     | 0.665 | 258    | 23    | 41        |
| NAT8   | <i>N</i> -acetyltransferase 8 (GCN5-related, putative) | Metabolism of proteins                                              | null                     | 0.008 | 30     | 0     | 57        |
| NOS3   | nitric oxide synthase 3 (endothelial cell)             | Hemostasis;<br>Immune System;<br>Metabolism;<br>Signal Transduction | null                     | 0.008 | 4      | 0     | 485       |
| IL6    | interleukin 6                                          | Cellular responses to stress; Immune System; Signal Transduction    | signalling molecule      | 0.005 | 2      | 0     | 1260      |
| CRP    | C-reactive protein, pentraxin-related                  | Immune System                                                       | defense/immunity protein | 0.005 | 2      | 0     | 437       |

Table S5. Cont.

| Symbol | Gene Name                                     | Pathway                                          | Panther Classification                                                                                    | Score | #PMIDs | #SNPs | #Diseases |
|--------|-----------------------------------------------|--------------------------------------------------|-----------------------------------------------------------------------------------------------------------|-------|--------|-------|-----------|
| VDR    | vitamin D (1,25-dihydroxyvitamin D3) receptor | Gene Expression                                  | transcription factor; receptor; nucleic acid binding                                                      | 0.005 | 2      | 0     | 352       |
| NAIP   | NLR family, apoptosis inhibitory protein      | null                                             | enzyme modulator                                                                                          | 0.003 | 1      | 0     | 24        |
| NOS2   | nitric oxide synthase 2, inducible            | Hemostasis; Immune System                        | null                                                                                                      | 0.003 | 1      | 0     | 438       |
| ICAM1  | intercellular adhesion molecule 1             | Extracellular matrix organization; Immune System | cell adhesion molecule; signalling molecule                                                               | 0.003 | 1      | 0     | 456       |
| SELE   | selectin E                                    | Hemostasis                                       | cell adhesion molecule; transfer/carrier protein; protease; hydrolase; defense/immunity protein; receptor | 0.003 | 1      | 0     | 222       |

Table S6. Top 10 diseases and phenotypes that share genes with Fabry disease.

| Disease Name                   | Type      | MeSH Disease Class                                     | #Shared Genes |
|--------------------------------|-----------|--------------------------------------------------------|---------------|
| Malignant neoplasm of breast   | disease   | Neoplasms; Skin and Connective Tissue Diseases         | 35            |
| Breast Carcinoma               | disease   | Neoplasms                                              | 34            |
| Malignant neoplasm of prostate | disease   | Neoplasms; Male Urogenital Diseases                    | 33            |
| Liver carcinoma                | disease   | Neoplasms; Digestive System Diseases                   | 32            |
| Prostate carcinoma             | disease   | Neoplasms                                              | 31            |
| Carcinogenesis                 | phenotype | Neoplasms; Pathological Conditions, Signs and Symptoms | 29            |
| Hypertensive disease           | disease   | Cardiovascular Diseases                                | 29            |
| Colorectal Cancer              | disease   | Neoplasms; Digestive System Diseases                   | 29            |
| Neoplasm Metastasis            | phenotype | Neoplasms; Pathological Conditions, Signs and Symptoms | 29            |
| Malignant neoplasm of lung     | disease   | Neoplasms; Respiratory Tract Diseases                  | 29            |

Table S7. Shared genes with Fabry disease amongst the Kidney Diseases group (25 shared genes).

| Symbol | Gene Name                                                       | Panther Classification                                                                        | Pathway/Process                                            |
|--------|-----------------------------------------------------------------|-----------------------------------------------------------------------------------------------|------------------------------------------------------------|
| IL1A   | interleukin 1, alpha                                            | signaling molecule                                                                            | Cellular responses to stress; Immune System                |
| VCAM1  | vascular cell adhesion molecule 1                               | cell adhesion molecule; phosphatase; hydrolase; defense/immunity protein; receptor            | Extracellular matrix organization; Immune System           |
| PON1   | paraoxonase 1                                                   |                                                                                               |                                                            |
| IL1B   | interleukin 1, beta                                             | signaling molecule                                                                            | Immune System                                              |
| TNF    | tumor necrosis factor                                           | signaling molecule                                                                            | Developmental Biology; Immune System; Signal Transduction  |
| AGT    | angiotensinogen (serpin peptidase inhibitor, clade A, member 8) | enzyme modulator                                                                              | Metabolism; Metabolism of proteins; Signal Transduction    |
| NOS3   | nitric oxide synthase 3 (endothelial cell)                      |                                                                                               | Hemostasis; Immune System; Metabolism; Signal Transduction |
| NAT8   | N-acetyltransferase 8 (GCN5-related, putative)                  |                                                                                               | Metabolism of proteins                                     |
| MGP    | matrix Gla protein                                              | signaling molecule; calcium-binding protein; structural protein; extracellular matrix protein |                                                            |

Table S7. Cont.

| Symbol | Gene Name                                                                                       | Panther Classification                                                                                                           | Pathway/Process                                                                      |
|--------|-------------------------------------------------------------------------------------------------|----------------------------------------------------------------------------------------------------------------------------------|--------------------------------------------------------------------------------------|
| G6PD   | glucose-6-phosphate dehydrogenase                                                               | oxidoreductase                                                                                                                   | Gene Expression; Metabolism                                                          |
| ACE    | angiotensin I converting enzyme                                                                 |                                                                                                                                  | Metabolism of proteins                                                               |
| NOS2   | nitric oxide synthase 2, inducible                                                              |                                                                                                                                  | Hemostasis; Immune System                                                            |
| MPO    | myeloperoxidase                                                                                 | oxidoreductase                                                                                                                   |                                                                                      |
| VEGFA  | vascular endothelial growth factor A                                                            | signaling molecule                                                                                                               | Cellular responses to stress; Developmental Biology; Hemostasis; Signal Transduction |
| IL10   | interleukin 10                                                                                  | signaling molecule                                                                                                               |                                                                                      |
| F5     | coagulation factor V (proaccelerin, labile factor)                                              | cell adhesion molecule; transfer/carrier protein; transporter; protease; enzyme modulator; oxidoreductase; hydrolase; signali... | Hemostasis; Metabolism of proteins; Vesicle-mediated transport                       |
| ICAM1  | intercellular adhesion molecule 1                                                               | cell adhesion molecule; signaling molecule                                                                                       | Extracellular matrix organization; Immune System                                     |
| GCNT2  | glucosaminyl (N-acetyl) transferase 2, I-branching enzyme (I blood group)                       | transferase                                                                                                                      |                                                                                      |
| UMOD   | uromodulin                                                                                      |                                                                                                                                  |                                                                                      |
| VDR    | vitamin D (1,25-dihydroxyvitamin D3) receptor                                                   | transcription factor; receptor; nucleic acid binding                                                                             | Gene Expression                                                                      |
| IL6    | interleukin 6                                                                                   | signaling molecule                                                                                                               | Cellular responses to stress; Immune System; Signal Transduction                     |
| KCNN4  | potassium channel, calcium activated intermediate/small conductance subfamily N alpha, member 4 |                                                                                                                                  | Neuronal System                                                                      |
| TBC1D9 | TBC1 domain family, member 9 (with GRAM domain)                                                 | enzyme modulator; hydrolase                                                                                                      |                                                                                      |
| ABCB1  | ATP-binding cassette, sub-family B (MDR/TAP), member 1                                          | transporter                                                                                                                      | Metabolism; Transmembrane transport of small molecules                               |
| CRP    | C-reactive protein, pentraxin-related                                                           | defense/immunity protein                                                                                                         | Immune System                                                                        |
